# Supplementary material for: New insights into the alkoxy effects on auxiliary adsorption and inhibiting charge recombination in dye-sensitized solar cells with high open circuit voltage: a theoretical investigation
Source: Royal Society of Chemistry journal article supplement (doi:10.1039/d2cp04867a), 2023-01-01
Supplement: d2cp04867a1.pdf [file d2cp04867a1.pdf]

## Supplementary Material for on-line publication only

### **New insights into the alkoxy effects on auxiliary adsorption and inhibiting charge recombination in dye-sensitized solar cells with high open circuit voltage: a theoretical investigation**

Zi-han Xu,<sup>a</sup> Chang-yan Zhu,<sup>c</sup> Xiao-fei Zhu,<sup>a</sup> Yu-juan Zhai,<sup>a</sup> Ji Zhang,<sup>\*a</sup> Han-cheng Zhu<sup>\*b</sup>

<sup>a</sup> *School of Chemistry and Life Science, Changchun University of Technology, Changchun 130012, Jilin, P. R. China.*

<sup>b</sup> *Key Laboratory of UV-Emitting Materials and Technology, Northeast Normal University, Ministry of Education, Changchun 130024, China.*

<sup>c</sup> *Institute of Functional Material Chemistry, School of Chemistry, Northeast Normal University, Changchun 130024, Jilin, P. R. China.*

**\*Corresponding author: Ji Zhang:** zhangj158@ccut.edu.cn;

**Han-cheng Zhu:** zhuhc@nenu.edu.cn

## 1. Computational Details about the molecular configuration search the optimization of dye@TiO<sub>2</sub> systems

Here, Molclus combined with XTB were used for the molecular configuration search of the ullazine dyes with long alkoxy chain. Molclus is a free, flexible and easy-to-use molecular configuration search program developed by Lu Tian.<sup>1</sup> XTB<sup>2</sup> is a program developed by Grimme specifically for GFN-XTB (Geometry, Frequency, Noncovalent, eXtended TB) calculation.<sup>3,4</sup> (1) First, run the dynamics with XTB under GFN0-xTB. The temperature is set to 500K. The total simulation time is 200ps. Write it into the track file every 50fs. Restrict the chemical bond distance related to hydrogen with shake algorithm. A total of 4000 configurations are saved in the track file; (2) the 4000 configurations were optimized with GFN0-xTB using crest program, then the Isostat tool in the Molclus program was carried out for the energy ranking and deleting the duplicated structures (3) these configurations without duplicated structures were further optimized with GFN2-xTB using crest program under the dichloromethane solvent model,<sup>5-7</sup> then Isostat tool is used again for the energy ranking and deleting the duplicated structures, the first 20 configurations with the lowest energy are retained; (4) geometric optimization and vibration analysis were carried out under vacuum for these 20 configurations with B3LYP-D3(BJ)/6-311G\*\* as implemented in Gaussian 16; (5) based on the optimized structures of the first 20 configurations, single point energy were performed with PWPB95-D3(BJ)/def2-TZVPP<sup>8-10</sup> combined with SMD model,<sup>11</sup> as implemented in ORCA (revision 4.2) program;<sup>12-14</sup> (5) at last, Gibbs free energy in solution and the Boltzmann distribution at 298.15K for these 20 configurations were calculated by Shermo program.<sup>15</sup> Here quasi-RRHO (rigid-rotor harmonic oscillator) model proposed by Grimme were used to consider the contribution of the internal motion of the system to the thermodynamic quantity.<sup>16</sup>

In order to investigate the alkoxy effects on the adsorption of dyes on the TiO<sub>2</sub> surface, the (TiO<sub>2</sub>)<sub>82</sub> cluster (Fig.S1), cutting an anatase slab to expose the majority (101) surface as proposed by Persson et al<sup>17</sup> and De Angelis et al,<sup>18</sup> were used to model the TiO<sub>2</sub> nanoparticle effects. The dye@(TiO<sub>2</sub>)<sub>82</sub> complexes with different adsorption configurations were optimized by the SIESTA program,<sup>19-21</sup> employing the generalized gradient approximation (GGA) of the

Perdew–Burke–Ernzerhof (PBE) <sup>22</sup> functional in conjunction with DZP Slater-type basis sets. During the optimization, a dispersion potential of the Grimme type were added to describe the weak interaction. <sup>23</sup> Additionally, the reliability of the approach discussed above has already been proven by multiple studies. <sup>24-32</sup>

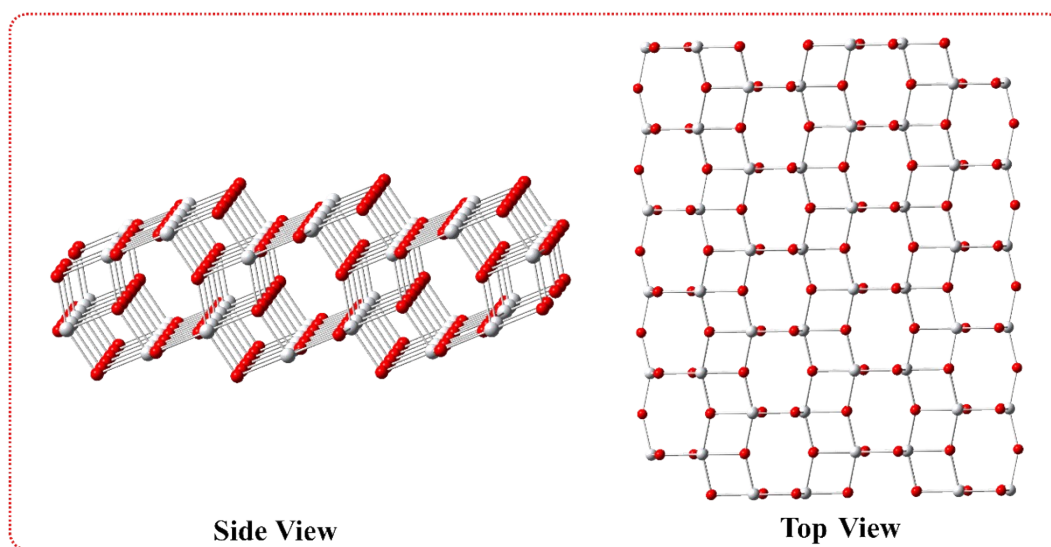

Fig. S1 Initial structure of (TiO<sub>2</sub>)<sub>82</sub> cluster in side and top view.

## 2. Details about the reduced density gradient (RDG) analysis and independent gradient model based on Hirshfeld partition (IGMH) analyses

Reduced density gradient (RDG) method proposed by Yang et al. <sup>33</sup> were used to visualize weak intramolecular interaction. The definition of the RDG function is shown below:

$$\text{RDG}(r) = \frac{1}{2(3\pi^2)^{1/3}} \frac{|\nabla\rho(r)|}{\rho(r)^{4/3}} \quad (1)$$

Here,  $\nabla\rho(r)$  is electron density gradient. Then, a real space function  $\text{sign}(\lambda_2)\rho$  can be mapped on the RDG isosurface by different colors to visually characterize the nature of the interactions as the color bar shown in Fig.3. Here,  $\text{sign}(\lambda_2)$  means the sign of the second largest eigenvalue of electron density Hessian matrix at position  $r$ . According to the color-filled RDG map, we can not only know where weak interaction occurs, but also intuitively capture the type of the

interaction.

Independent gradient model based on Hirshfeld partition (IGMH) analyses in Multiwfn were carried out for the visual study of interactions between the adsorbed sensitizer and the TiO<sub>2</sub> surface<sup>34</sup>. IGMH analyses is based on the discussion of  $\delta g$ , which is a real three-dimensional real space function and could clearly display the interaction region between atoms. The stronger the interaction between atoms, the larger the  $\delta g$  in the interaction region.  $\delta g$  is defined as the difference between two density gradients, that is the independent gradient based on Hirshfeld partition ( $g^{IGMH}$ ) and gradient of promolecular density ( $g$ )

$$\delta g(r) = g^{IGMH}(r) - g(r) \quad (2)$$

$$g^{IGMH}(r) = \sum |\nabla \rho_i^{Hirsh}(r)| \quad (3)$$

$$g(r) = \left| \sum_i \nabla \rho_i^{Hirsh}(r) \right| \quad (4)$$

where  $r$  denotes Cartesian coordinate vector,  $i$  loops over all atoms.  $\rho_i^{Hirsh}$  is the atomic density based on Hirshfeld partition, and can be defined as the product of actual electron density calculated by quantum chemistry method ( $\rho$ ) and the Hirshfeld weighting function of the atom  $i$  ( $w_i$ )

$$\rho_i^{Hirsh}(r) = \rho(r)w_i(r) \quad (5)$$

with

$$w_i(r) = \frac{\rho_i^{free}(r)}{\rho^{pro}(r)} = \frac{\rho_i^{free}(r)}{\sum_j \rho_j^{free}(r)} \quad (6)$$

Here,  $\rho_i^{free}$  is the free-state atomic density. Then, the gradient of Hirshfeld atomic density  $\nabla \rho_i^{Hirsh}$  can be calculated:

$$\nabla \rho_i^{Hirsh} = \frac{\partial \rho_i^{Hirsh}}{\partial \mu} = \frac{\partial(\rho w_i)}{\partial \mu} = w_i \frac{\partial \rho}{\partial \mu} + \rho \frac{\partial w_i}{\partial \mu} = \frac{\rho_i^{free}}{\rho^{pro}} \frac{\partial \rho}{\partial \mu} + \frac{\rho}{\rho^{pro}} \frac{\partial \rho_i^{free}}{\partial \mu} - \frac{\rho \rho_i^{free}}{(\rho^{pro})^2} \sum_j \frac{\partial \rho_j^{free}}{\partial \mu} \quad (7)$$

And  $\mu$  is the Cartesian coordinate component

Then,  $\delta g$  can be divided into  $\delta g^{intra}$  used to show the interaction within fragment and  $\delta g^{inter}$  used to show the interaction between fragment. Here we focus on the  $\delta g^{inter}$ . It is defined as below:

$$\delta g^{inter}(r) = g^{IGM,inter}(r) - g^{inter}(r) \quad (8)$$

with

$$g^{inter}(r) = \left| \sum_A \sum_{i \in A} \nabla \rho_i^{Hirsh}(r) \right| \quad (9)$$

$$g^{IGM,inter}(r) = \sum_A \left| \sum_{i \in A} \nabla \rho_i^{Hirsh}(r) \right| \quad (10)$$

A represents the fragment and i represents the atom in the fragment.

Then, the real space function  $sign(\lambda_2)\rho$  can be mapped on the isosurface of  $\delta g^{inter}$  by different colors to visually characterize the nature of the interactions as the color bar shown in Fig. S2.

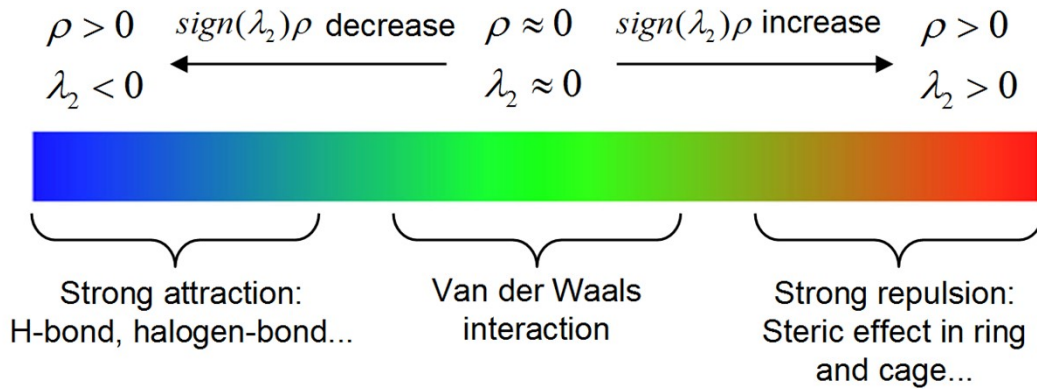

Fig. S2 Color scale bar used to represent values of  $sign(\lambda_2)\rho$ .

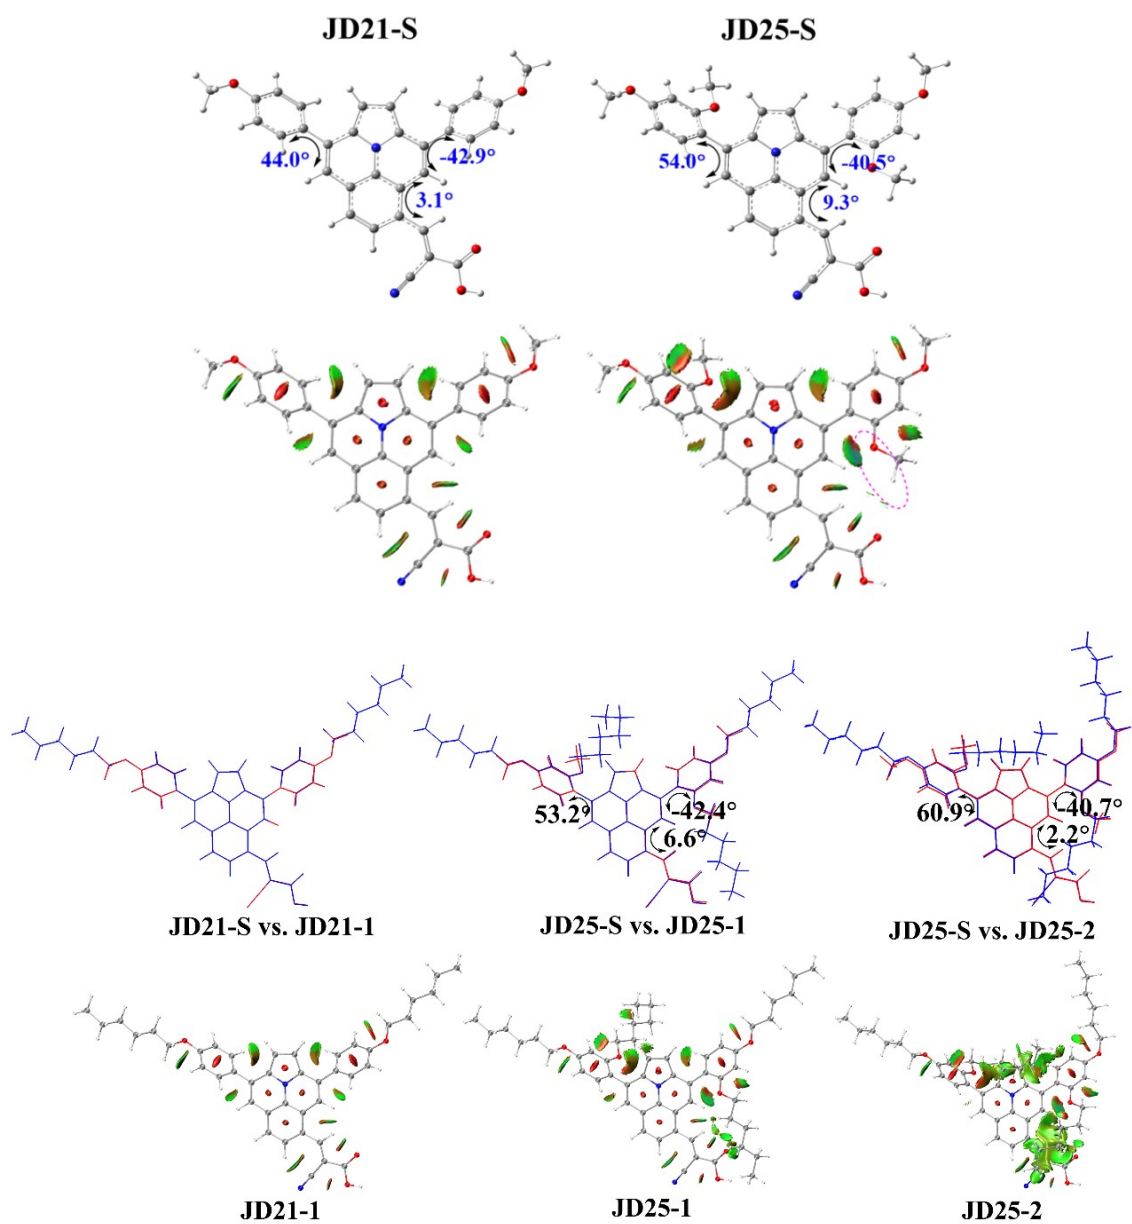

Fig. S3 Optimized molecular structures with main dihedral angle, as well as the color-filled RDG map with iso-surface of 0.7 a.u.

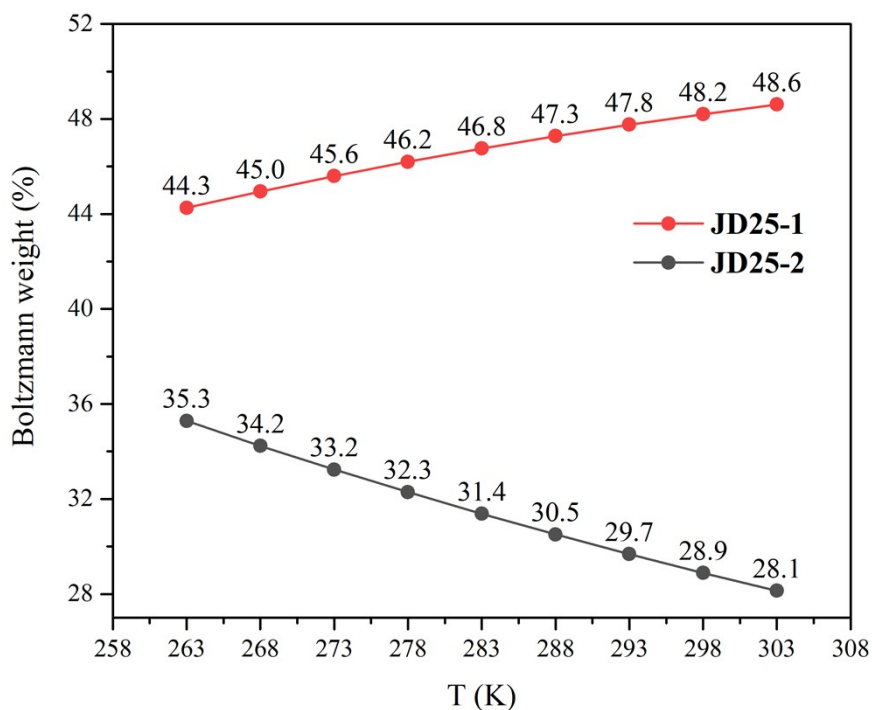

Fig.S4 Variation of Boltzmann weight with temperature for **JD25-1** and **JD25-2**.

Table S1 Calculated thermodynamic values of different conformations of **JD25** at different temperatures.

| T (K) | System        | U (a.u.)  | H (a.u.)  | G (a.u.)  | S (J/mol/K) | CV (J/mol/K) | Relative G | Boltzmann weight |
|-------|---------------|-----------|-----------|-----------|-------------|--------------|------------|------------------|
| 263   | <b>JD25-1</b> | -2656.364 | -2656.363 | -2656.492 | 1285.934    | 891.116      | 0          | 44.26%           |
|       | <b>JD25-2</b> | -2656.367 | -2656.366 | -2656.492 | 1258.315    | 888.402      | 0.495      | 35.29%           |
| 268   | <b>JD25-1</b> | -2656.362 | -2656.362 | -2656.494 | 1300.546    | 905.843      | 0          | 44.95%           |
|       | <b>JD25-2</b> | -2656.365 | -2656.364 | -2656.494 | 1272.979    | 903.266      | 0.607      | 34.24%           |
| 273   | <b>JD25-1</b> | -2656.361 | -2656.360 | -2656.497 | 1315.155    | 920.636      | 0          | 45.60%           |
|       | <b>JD25-2</b> | -2656.363 | -2656.362 | -2656.496 | 1287.641    | 918.191      | 0.717      | 33.24%           |
| 278   | <b>JD25-1</b> | -2656.359 | -2656.358 | -2656.499 | 1329.763    | 935.489      | 0          | 46.20%           |
|       | <b>JD25-2</b> | -2656.362 | -2656.361 | -2656.499 | 1302.302    | 933.169      | 0.828      | 32.29%           |
| 283   | <b>JD25-1</b> | -2656.357 | -2656.356 | -2656.501 | 1344.37     | 950.393      | 0          | 46.76%           |
|       | <b>JD25-2</b> | -2656.360 | -2656.359 | -2656.501 | 1316.964    | 948.193      | 0.939      | 31.38%           |
| 288   | <b>JD25-1</b> | -2656.355 | -2656.354 | -2656.503 | 1358.977    | 965.343      | 0          | 47.28%           |
|       | <b>JD25-2</b> | -2656.358 | -2656.357 | -2656.503 | 1331.628    | 963.257      | 1.049      | 30.51%           |
| 293   | <b>JD25-1</b> | -2656.353 | -2656.353 | -2656.506 | 1373.586    | 980.33       | 0          | 47.76%           |
|       | <b>JD25-2</b> | -2656.356 | -2656.355 | -2656.505 | 1346.294    | 978.354      | 1.158      | 29.68%           |
| 298   | <b>JD25-1</b> | -2656.352 | -2656.351 | -2656.508 | 1388.197    | 995.347      | 0          | 48.20%           |
|       | <b>JD25-2</b> | -2656.354 | -2656.353 | -2656.508 | 1360.963    | 993.476      | 1.268      | 28.89%           |
| 303   | <b>JD25-1</b> | -2656.350 | -2656.349 | -2656.511 | 1402.81     | 1010.387     | 0          | 48.61%           |
|       | <b>JD25-2</b> | -2656.352 | -2656.351 | -2656.510 | 1375.635    | 1008.616     | 1.377      | 28.14%           |

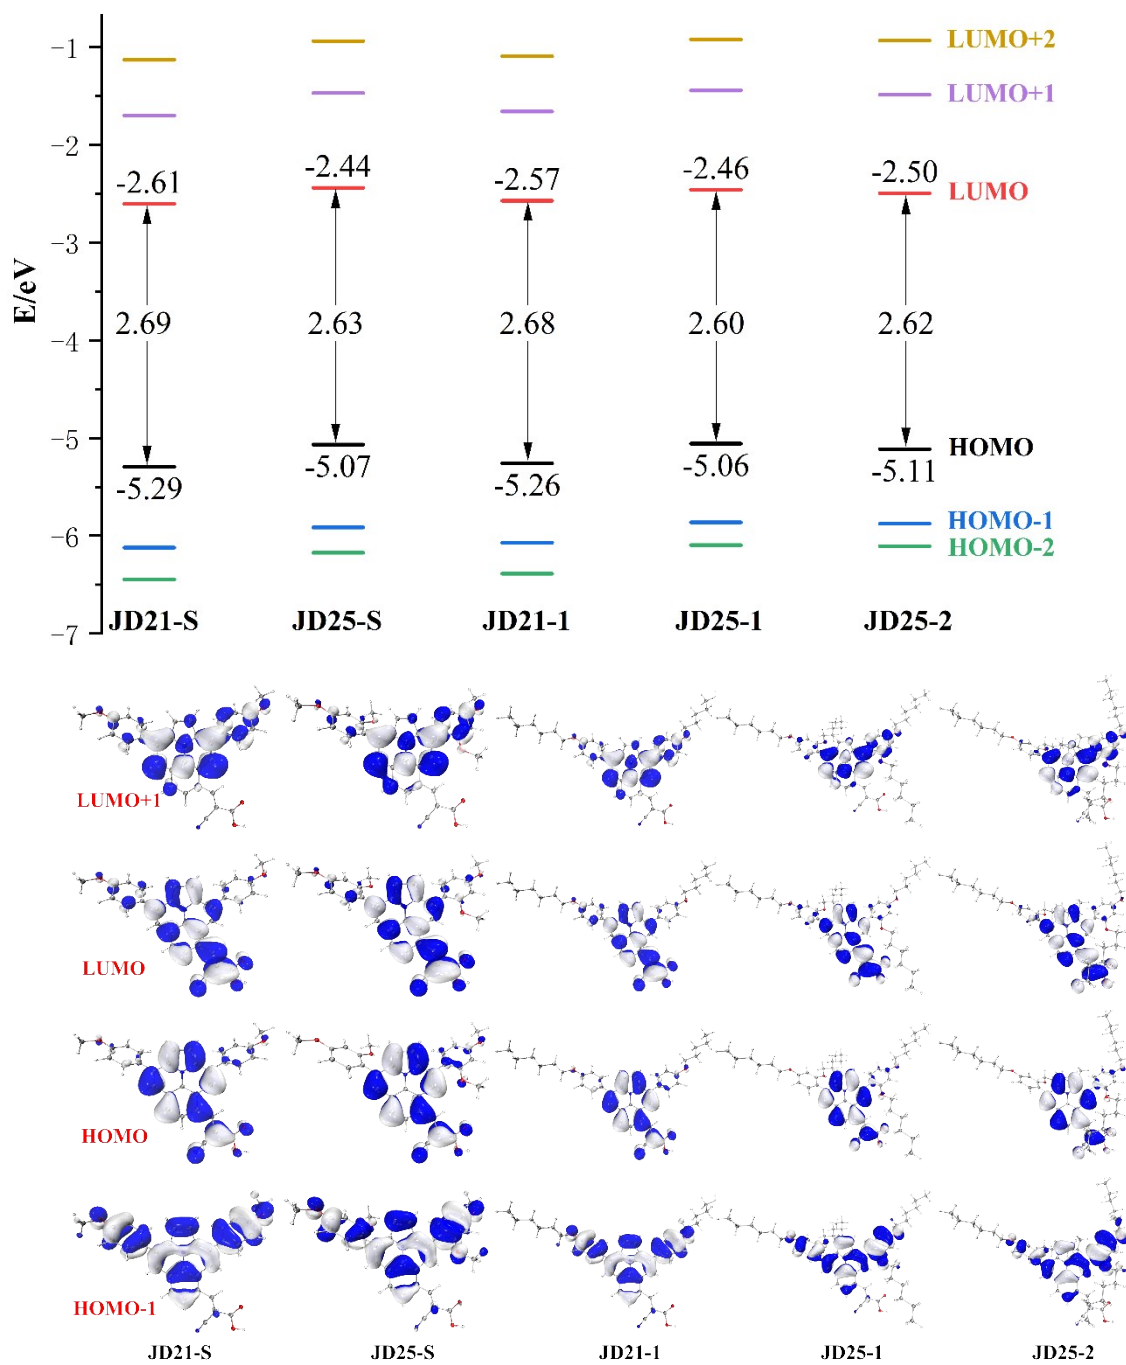

Fig.S5 Distributions of frontier molecular orbitals as well as the energies with an isosurface of 0.02 a.u.



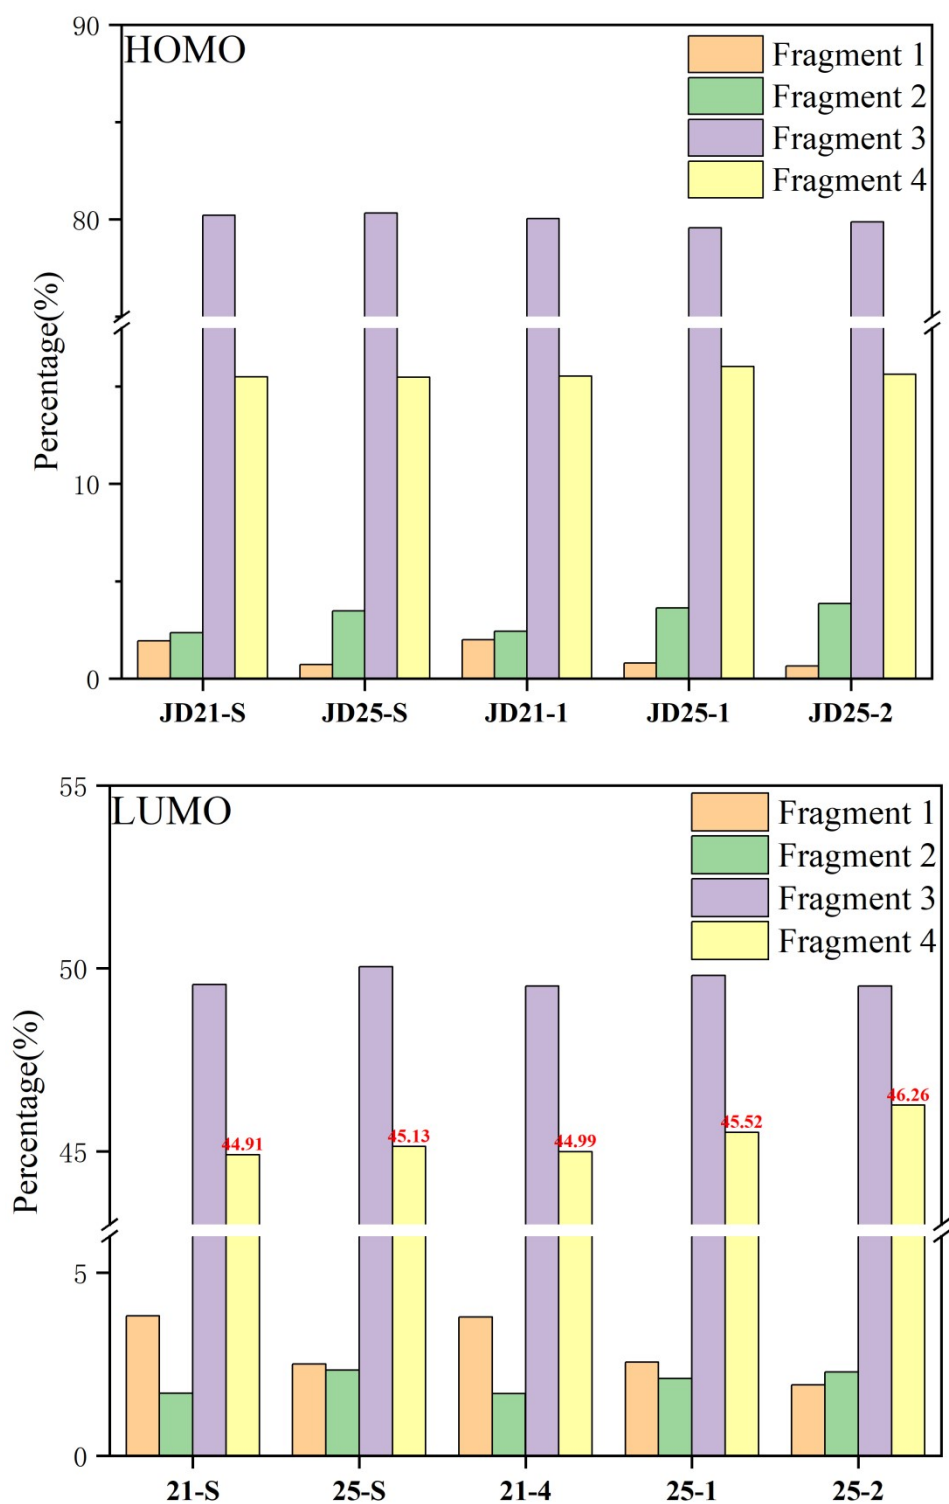

Fig. S6 Molecular orbital composition of HOMO and LUMO for these ullazine dyes in terms of each part. (Fragment 1: the left methoxy substituted benzene ring; Fragment 2: the right methoxy substituted benzene ring; Fragment 3: ullazine ring; Fragment 4: cyanoacrylic acid acceptor)

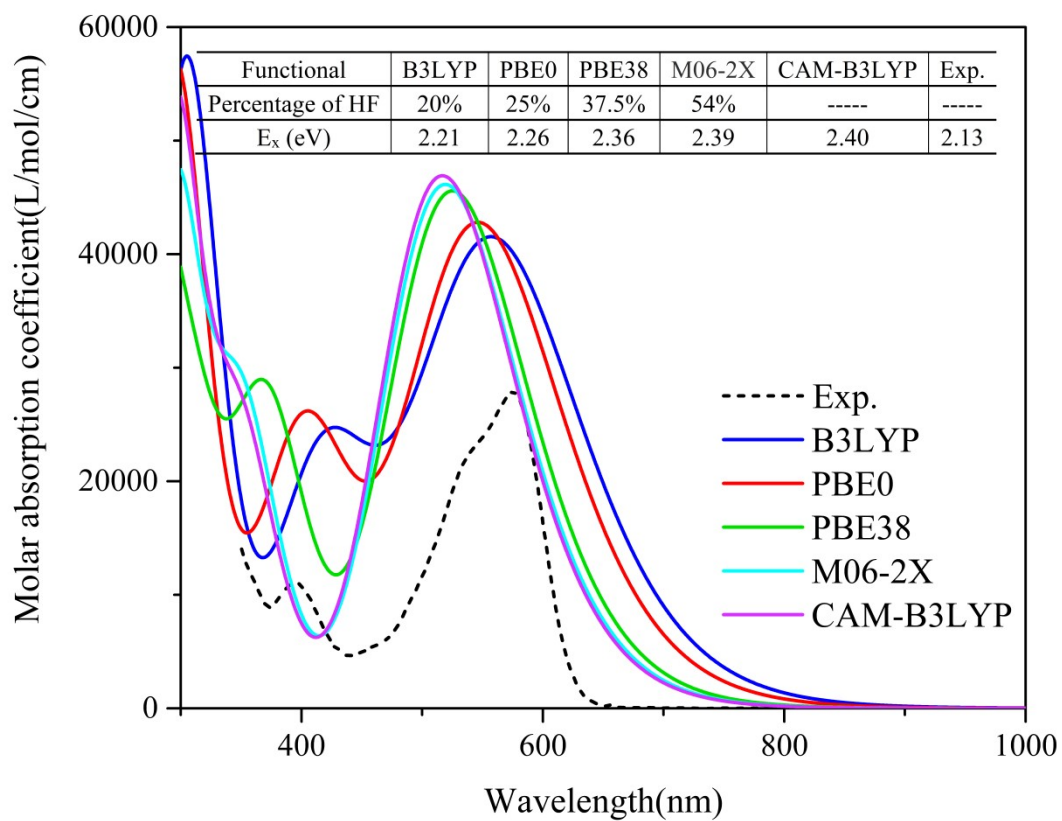

Fig. S7 Calculated absorption spectra of **JD21-S** at different functionals in comparison with experimental values.

B3LYP: <sup>35</sup>

PBE0: <sup>36</sup>

PBE38: <sup>37</sup>

M06-2X: <sup>38</sup>

CAM-B3LYP: <sup>39</sup>

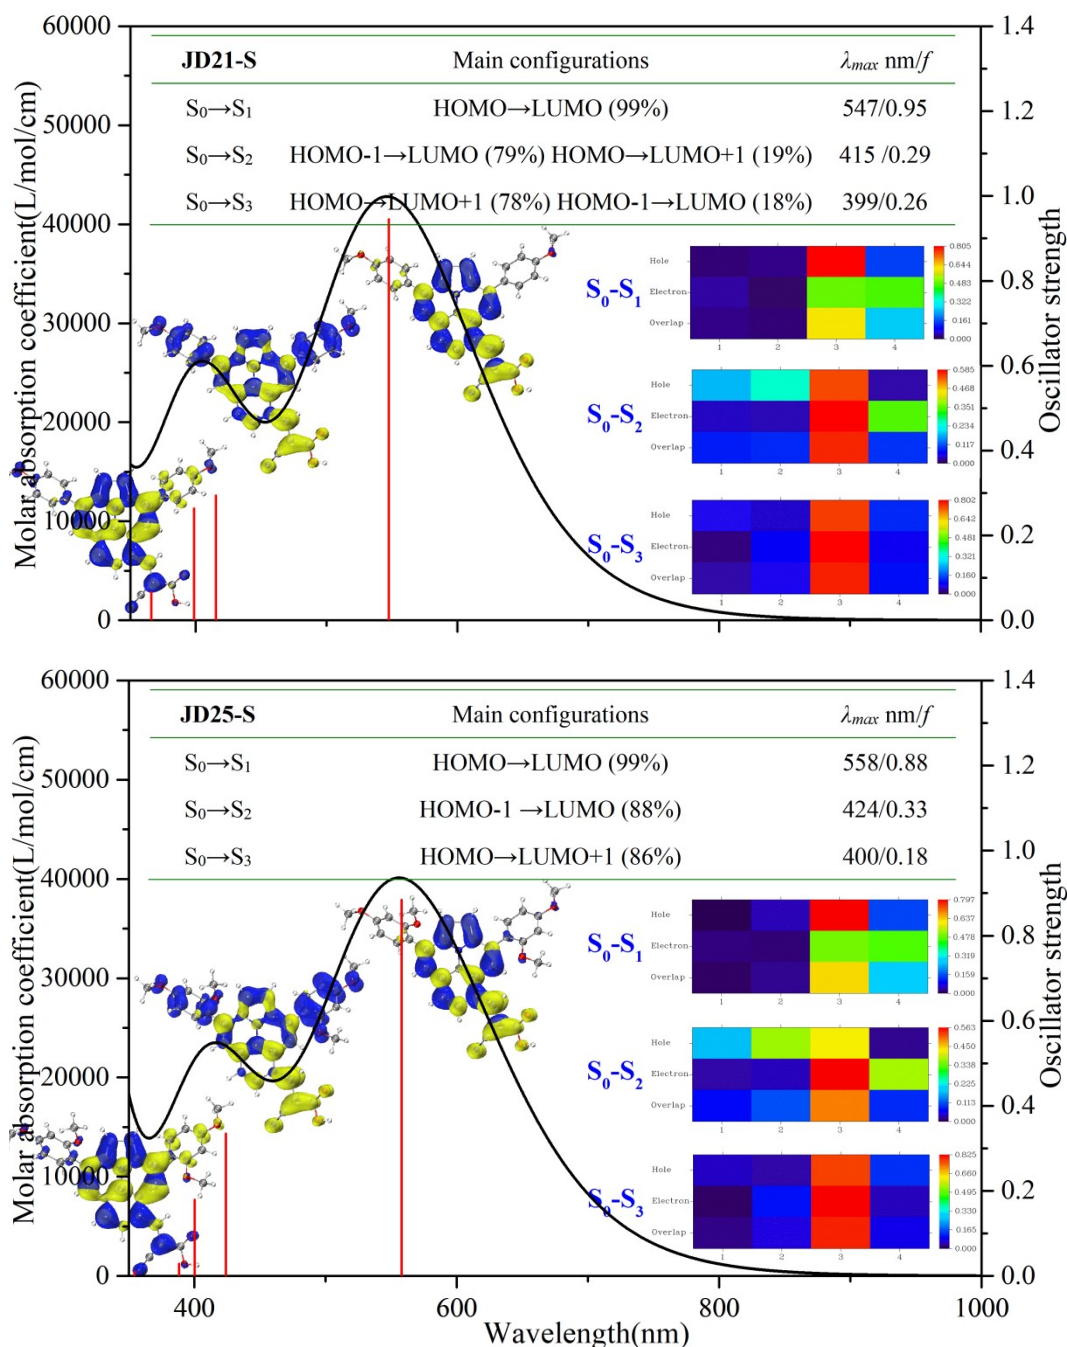

Fig. S8 Simulated absorption spectra with oscillator strength ( $f$ ), corresponding computed absorption wavelength ( $\lambda_{max}$ , nm), major transition configuration, hole and electron distributions (isosurface = 0.02 a.u.) as well as the fragment contributions plotted as heat map for visual inspection at TD-PCM-PBE0/6-311G\*\* level in dichloromethane solvent. (Blue regions denote the hole distributions and yellow regions denote the electron distributions. Fragment 1: the left methoxy substituted benzene ring; Fragment 2: the right methoxy substituted benzene ring; Fragment 3: ullazine ring; Fragment 4: cyanoacrylic acid acceptor))

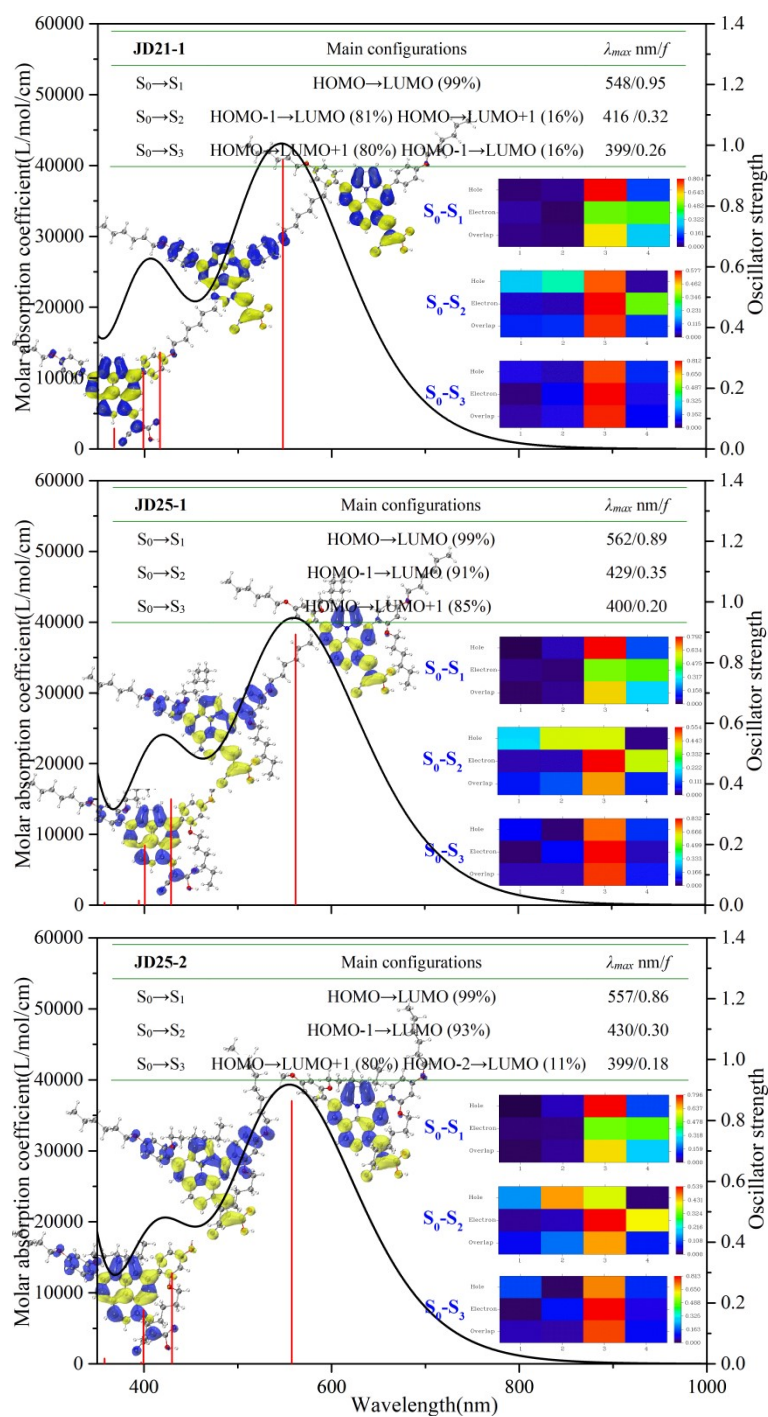

Fig. S9 Simulated absorption spectra with oscillator strength ( $f$ ), corresponding computed absorption wavelength ( $\lambda_{max}$ , nm), major transition configuration, hole and electron distributions (isosurface = 0.02 a.u.) as well as the fragment contributions plotted as heat map for visual inspection at TD-PCM-PBE0/6-311G\*\* level in dichloromethane solvent. (Blue regions denote the hole distributions and yellow regions denote the electron distributions. Fragment 1: the left methoxy substituted benzene ring; Fragment 2: the right methoxy substituted benzene ring; Fragment 3: ullazine ring; Fragment 4: cyanoacrylic acid acceptor))

## Details about the discussion of the hole and electron distributions and heat maps

Although the electron transfer characteristics can be investigated by investigating the hole and electron isosurface map, the image obviously depends on the selection of iso-surface. Therefore, by drawing hole/electron composition as heat map, we can more intuitively reflect the contribution of the fragment to holes and electrons. By viewing color of the matrix elements of these heat maps, we can immediately make clear where the excited electrons come and where they go. At the same time, the contributions of each fragment to electrons and holes are listed in Table S2. We compare the heat maps of **JD21-S** and **JD25-S** to investigate the effect of additional alkoxy groups on the transition properties. We find that the addition of methoxy group have little effect on the transition of  $S_0-S_1$ . Holes are mainly distributed on ullazine (fragment 3), while electrons are distributed on ullazine (fragment 3) and cyanoacrylic acid receptors (fragment 4). Methoxy group effects on the transition of  $S_0-S_3$  is mainly reflected in the electron distribution on the receptor, from 8% reduce to 5%. The addition of methoxy group has a great influence on the transition of  $S_0-S_2$ . From the heat map, it can be seen that the holes corresponding to this transition are not only distributed on the ullazine and cyanoacrylic acid acceptor, but also on the methoxy substituted benzene rings on the left and right sides, and the electrons are mainly distributed on the ullazine and cyanoacrylic acid acceptor. After the addition of methoxy group, the hole distribution on ullazine fragment decreases from 54% to 43%, and the electron distribution on cyanoacrylic acid increases from 34% to 38%. By comparing Fig. 11 and Fig. 12, we can explore the influence of alkyl chain simplification on the transition properties of dyes. We find that there is almost no change for **JD21-1** as compared with **JD21-S**, and the same as **JD25-1** versus **JD25-S**. Compared with the simplified dyes, the  $S_0-S_2$  and  $S_0-S_3$  transitions of **JD25-2** change a lot. For the  $S_0-S_2$  transition, the hole distribution on the ullazine fragment decreases and the electron distribution on the cyanoacrylic acid increases from 38% to 40% after the alkyl chain grows. For the  $S_0-S_3$  transition, the electron distribution on cyanoacrylic acid acceptor increases from 5% to 7%, as high as **JD21-1**. According to the working principle of DSSCs, we know that the more electrons distributed on the acceptor group, the more electrons injected into the

conduction band of the semiconductor after light excitation, so as to improve the efficiency of the device. In general, through the analysis of the transition properties of these dyes, we get the conclusion that when there is a strong interaction between alkyl chain and dye molecules, it will have a certain impact on the electronic structure of dyes, especially the electron distributions on the acceptor group after light excitation.

Table S2 Calculated contributions of each fragment to hole and electron distributions upon photoexcitation.

| Dye         | transition                     | h <sup>+</sup> /e <sup>-</sup> | 1     | 2     | 3     | 4            |
|-------------|--------------------------------|--------------------------------|-------|-------|-------|--------------|
| <b>21-S</b> | S <sub>0</sub> →S <sub>1</sub> | Hole                           | 1.95  | 2.82  | 80.51 | 14.72        |
|             |                                | Electron                       | 3.56  | 1.40  | 48.73 | <b>46.31</b> |
|             | S <sub>0</sub> →S <sub>2</sub> | Hole                           | 17.89 | 24.97 | 54.27 | 2.87         |
|             |                                | Electron                       | 3.91  | 3.36  | 58.54 | <b>34.18</b> |
|             | S <sub>0</sub> →S <sub>3</sub> | Hole                           | 6.84  | 5.46  | 75.32 | 12.39        |
|             |                                | Electron                       | 2.43  | 9.05  | 80.23 | <b>8.29</b>  |
| <b>25-S</b> | S <sub>0</sub> →S <sub>1</sub> | Hole                           | 0.74  | 4.67  | 79.68 | 14.91        |
|             |                                | Electron                       | 2.40  | 1.97  | 49.50 | <b>46.12</b> |
|             | S <sub>0</sub> →S <sub>2</sub> | Hole                           | 17.56 | 37.13 | 43.27 | 2.04         |
|             |                                | Electron                       | 2.86  | 3.34  | 56.30 | <b>37.50</b> |
|             | S <sub>0</sub> →S <sub>3</sub> | Hole                           | 5.47  | 3.98  | 77.07 | 13.48        |
|             |                                | Electron                       | 1.40  | 10.91 | 82.51 | <b>5.18</b>  |
| <b>21-1</b> | S <sub>0</sub> →S <sub>1</sub> | Hole                           | 1.97  | 2.86  | 80.40 | 14.77        |
|             |                                | Electron                       | 3.54  | 1.39  | 48.78 | <b>46.28</b> |
|             | S <sub>0</sub> →S <sub>2</sub> | Hole                           | 18.73 | 25.99 | 52.68 | 2.60         |
|             |                                | Electron                       | 3.95  | 3.21  | 57.75 | <b>35.09</b> |
|             | S <sub>0</sub> →S <sub>3</sub> | Hole                           | 6.43  | 4.91  | 75.98 | 12.68        |
|             |                                | Electron                       | 2.42  | 9.14  | 81.19 | <b>7.25</b>  |
| <b>25-1</b> | S <sub>0</sub> →S <sub>1</sub> | Hole                           | 0.81  | 4.56  | 79.21 | 15.42        |
|             |                                | Electron                       | 2.55  | 1.95  | 49.65 | <b>45.84</b> |
|             | S <sub>0</sub> →S <sub>2</sub> | Hole                           | 19.16 | 39.33 | 39.76 | 1.75         |
|             |                                | Electron                       | 2.99  | 3.08  | 55.39 | <b>38.54</b> |
|             | S <sub>0</sub> →S <sub>3</sub> | Hole                           | 9.52  | 2.09  | 74.65 | 13.75        |
|             |                                | Electron                       | 1.93  | 9.90  | 83.20 | <b>4.97</b>  |
| <b>25-2</b> | S <sub>0</sub> →S <sub>1</sub> | Hole                           | 0.61  | 4.78  | 79.62 | 14.99        |
|             |                                | Electron                       | 2.01  | 2.22  | 49.08 | <b>46.68</b> |
|             | S <sub>0</sub> →S <sub>2</sub> | Hole                           | 14.25 | 45.77 | 38.58 | 1.40         |
|             |                                | Electron                       | 2.31  | 3.36  | 53.92 | <b>40.42</b> |
|             | S <sub>0</sub> →S <sub>3</sub> | Hole                           | 15.07 | 1.57  | 70.76 | 12.60        |
|             |                                | Electron                       | 1.34  | 10.65 | 81.28 | <b>6.73</b>  |

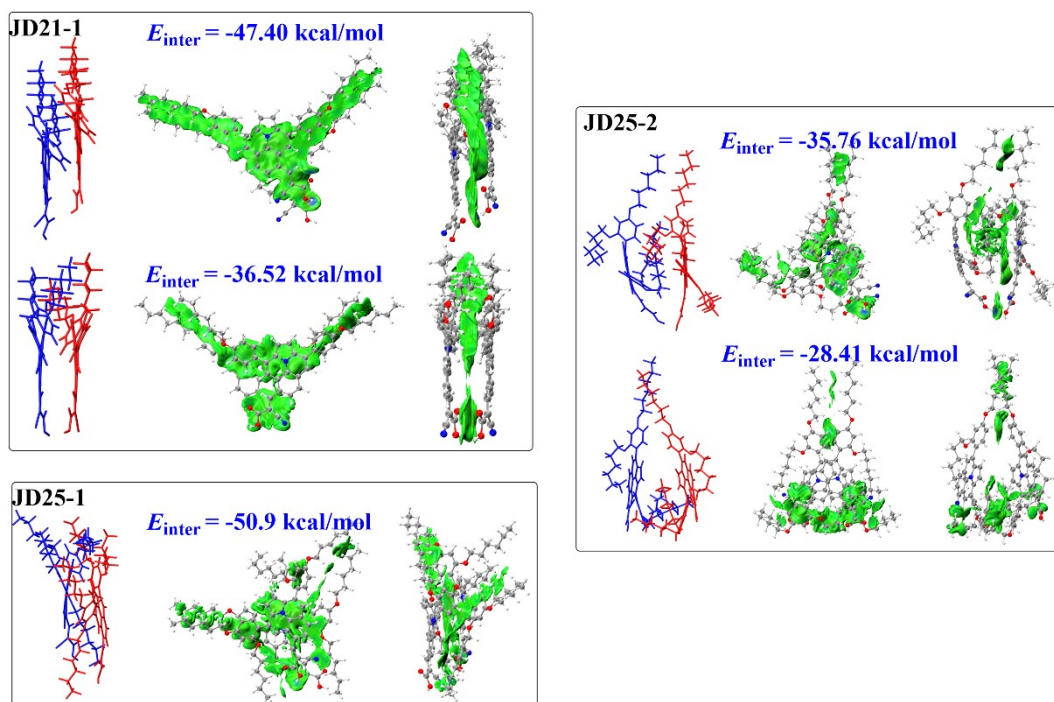

Fig. S10 Optimized geometries of the dyes in face-to-face configurations as well as the interaction energies at B3LYP-D3(BJ)/6-311G\*\* with BSSE correction and  $sign(\lambda_2)\rho$  colored isosurfaces of  $\delta g^{inter} = 0.002$  a.u. corresponding to IGMH analyses.

#### Detailed discussion:

For the dimer formed by **JD21-1** and **JD25-1**, because the alkyl chain is in an extended state, it has little effect on the conjugate system of the dye molecular, the  $E_{inter}$  comes from the  $\pi$ - $\pi$  interaction between the conjugated fragments and vdW interaction between the alkyl chain and the alkyl chain. For **JD25-2**, since the  $\pi$ - $\pi$  interaction of the conjugate fragment is effectively avoided due to the addition of the alkyl chain, which is wound on the molecular skeleton, the  $E_{inter}$  mainly comes from the vdW interaction between the alkyl chain and the alkyl chain.

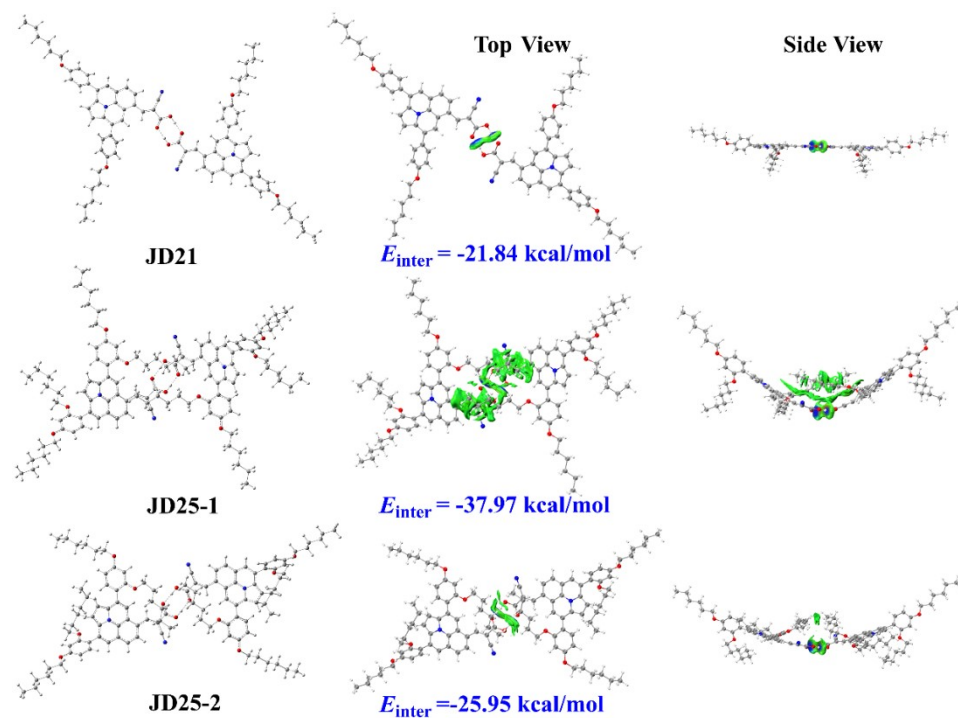

Fig. S11 Optimized geometries of the dyes in tail-to-tail configurations as well as the interaction energies at B3LYP-D3(BJ)/6-311G\*\* with BSSE correction and  $sign(\lambda_2)\rho$  colored isosurfaces of  $\delta g^{inter} = 0.002$  a.u. corresponding to IGMH analyses.

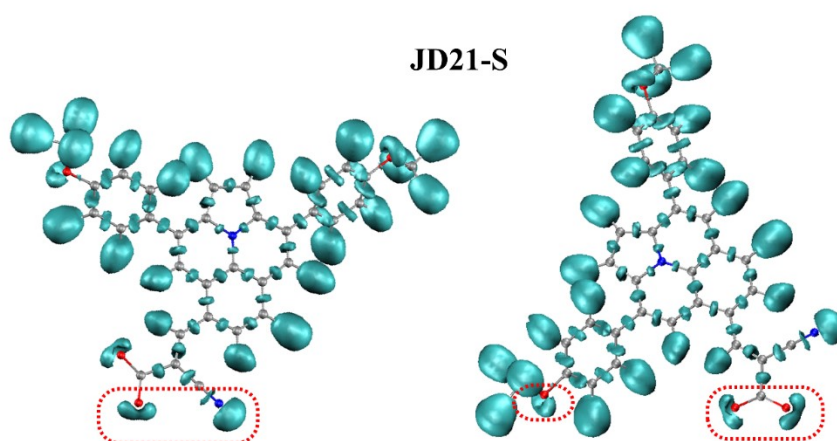

Fig. S12 The ELF with isosurface of 0.87 a.u. for dissociated **JD21-S**.



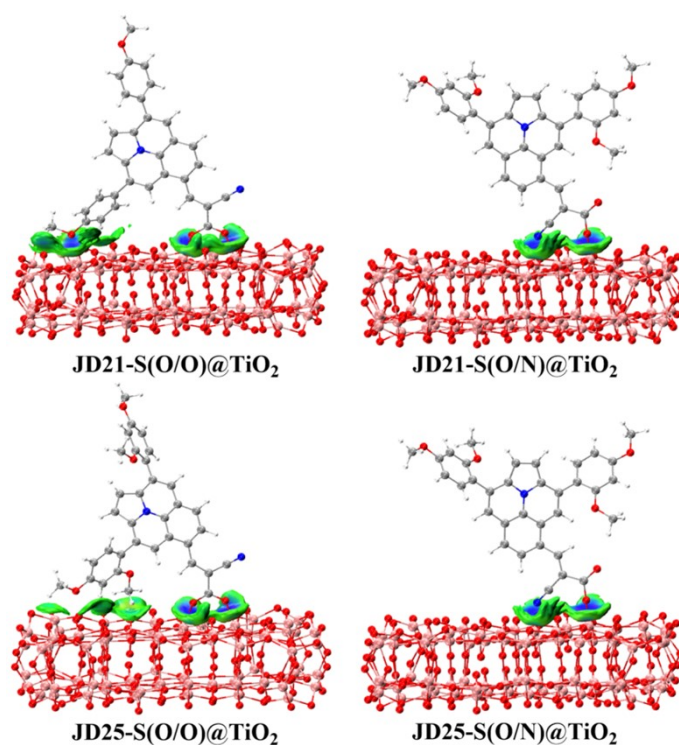

Fig. S13  $sign(\lambda_2)\rho$  colored isosurfaces of  $\delta g^{inter} = 0.002$  a.u. corresponding to IGMH analyses.

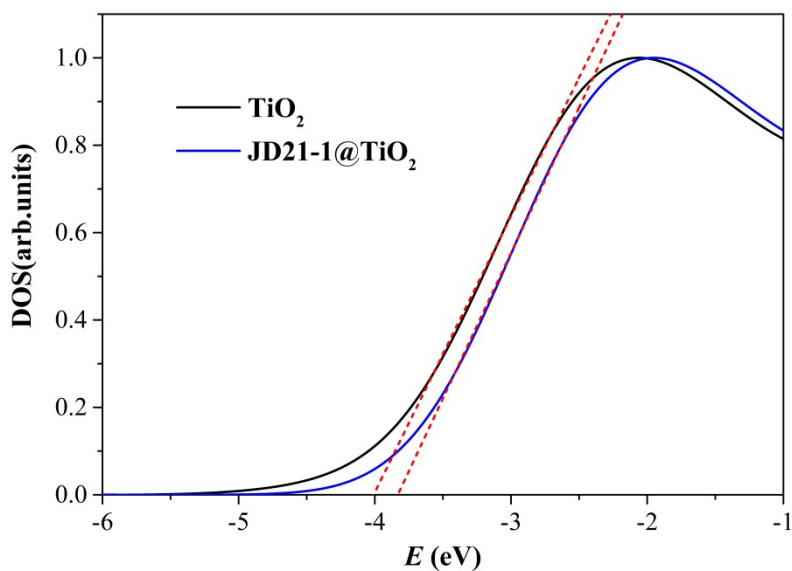

Fig. S14 Total and Partial Density of States (DOS) for **JD21-1** adsorbed on  $(\text{TiO}_2)_{82}$  cluster. (black solid line)  $(\text{TiO}_2)_{82}$  cluster DOS, (blue dash line) PDOS,  $(\text{TiO}_2)_{48}$  cluster contribution to the total DOS. The red solid lines intercepts with the energy axis correspond to the calculated CB edges.

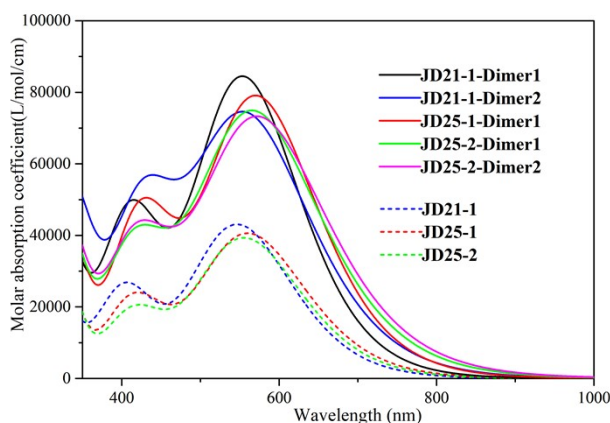

Fig. S15 Simulated absorption spectra for the monomers (dotted line) and dimers (solid line) using Gaussian function with a full width at half-maximum (FWHM) of 0.3 eV to broaden the theoretically calculated data as spectrum curve.

Table S3 The computed maximum absorption wavelengths ( $\lambda_{\max}$ ), oscillator strengths ( $f$ ), major transition configuration of these dimers.

|                          |                                                                     |                       |
|--------------------------|---------------------------------------------------------------------|-----------------------|
| <b>21-1-Dimer1</b>       | Main configuration                                                  | $\lambda_{\max}$ nm/f |
| $S_0 \rightarrow S_3$    | HOMO-1 $\rightarrow$ LUMO (63%) HOMO $\rightarrow$ LUMO+1 (34%)     | 555/1.71              |
| $S_0 \rightarrow S_6$    | HOMO-3 $\rightarrow$ LUMO (59%) HOMO-1 $\rightarrow$ LUMO+2 (13%)   | 423/0.32              |
| $S_0 \rightarrow S_8$    | HOMO-1 $\rightarrow$ LUMO+2 (30%) HOMO-1 $\rightarrow$ LUMO+3 (24%) | 409/0.44              |
| <b>21-1-Dimer2</b>       | Main configuration                                                  | $\lambda_{\max}$ nm/f |
| $S_0 \rightarrow S_4$    | HOMO-1 $\rightarrow$ LUMO+1 (89%)                                   | 544/1.09              |
| $S_0 \rightarrow S_6$    | HOMO-2 $\rightarrow$ LUMO (52%) HOMO $\rightarrow$ LUMO+2 (17%)     | 441/0.49              |
| $S_0 \rightarrow S_{10}$ | HOMO-3 $\rightarrow$ LUMO+1 (70%) HOMO $\rightarrow$ LUMO+3 (20%)   | 418/0.34              |
| <b>25-1-Dimer1</b>       | Main configuration                                                  | $\lambda_{\max}$ nm/f |
| $S_0 \rightarrow S_2$    | HOMO $\rightarrow$ LUMO+1 (60%) HOMO-1 $\rightarrow$ LUMO (34%)     | 572/1.54              |
| $S_0 \rightarrow S_6$    | HOMO-3 $\rightarrow$ LUMO+1 (71%) HOMO-2 $\rightarrow$ LUMO+1 (13%) | 435/0.41              |
| $S_0 \rightarrow S_7$    | HOMO-1 $\rightarrow$ LUMO+2 (86%) HOMO-2 $\rightarrow$ LUMO (9%)    | 414/0.18              |
| <b>25-2-Dimer1</b>       | Main configuration                                                  | $\lambda_{\max}$ nm/f |
| $S_0 \rightarrow S_2$    | HOMO-1 $\rightarrow$ LUMO+1 (78%) HOMO $\rightarrow$ LUMO (21%)     | 569/1.65              |
| $S_0 \rightarrow S_6$    | HOMO-3 $\rightarrow$ LUMO (85%) HOMO $\rightarrow$ LUMO+2 (12%)     | 430/0.33              |
| $S_0 \rightarrow S_8$    | HOMO-1 $\rightarrow$ LUMO+3 (86%) HOMO-2 $\rightarrow$ LUMO+1 (8%)  | 408/0.21              |
| <b>25-2-Dimer2</b>       | Main configuration                                                  | $\lambda_{\max}$ nm/f |
| $S_0 \rightarrow S_1$    | HOMO $\rightarrow$ LUMO (99%)                                       | 580/0.87              |
| $S_0 \rightarrow S_2$    | HOMO-1 $\rightarrow$ LUMO+1 (98%)                                   | 572/0.91              |
| $S_0 \rightarrow S_6$    | HOMO-3 $\rightarrow$ LUMO+1 (87%) HOMO-1 $\rightarrow$ LUMO+3 (10%) | 433/0.30              |
| $S_0 \rightarrow S_8$    | HOMO-1 $\rightarrow$ LUMO+3 (83%) HOMO-3 $\rightarrow$ LUMO+1 (11%) | 409/0.25              |

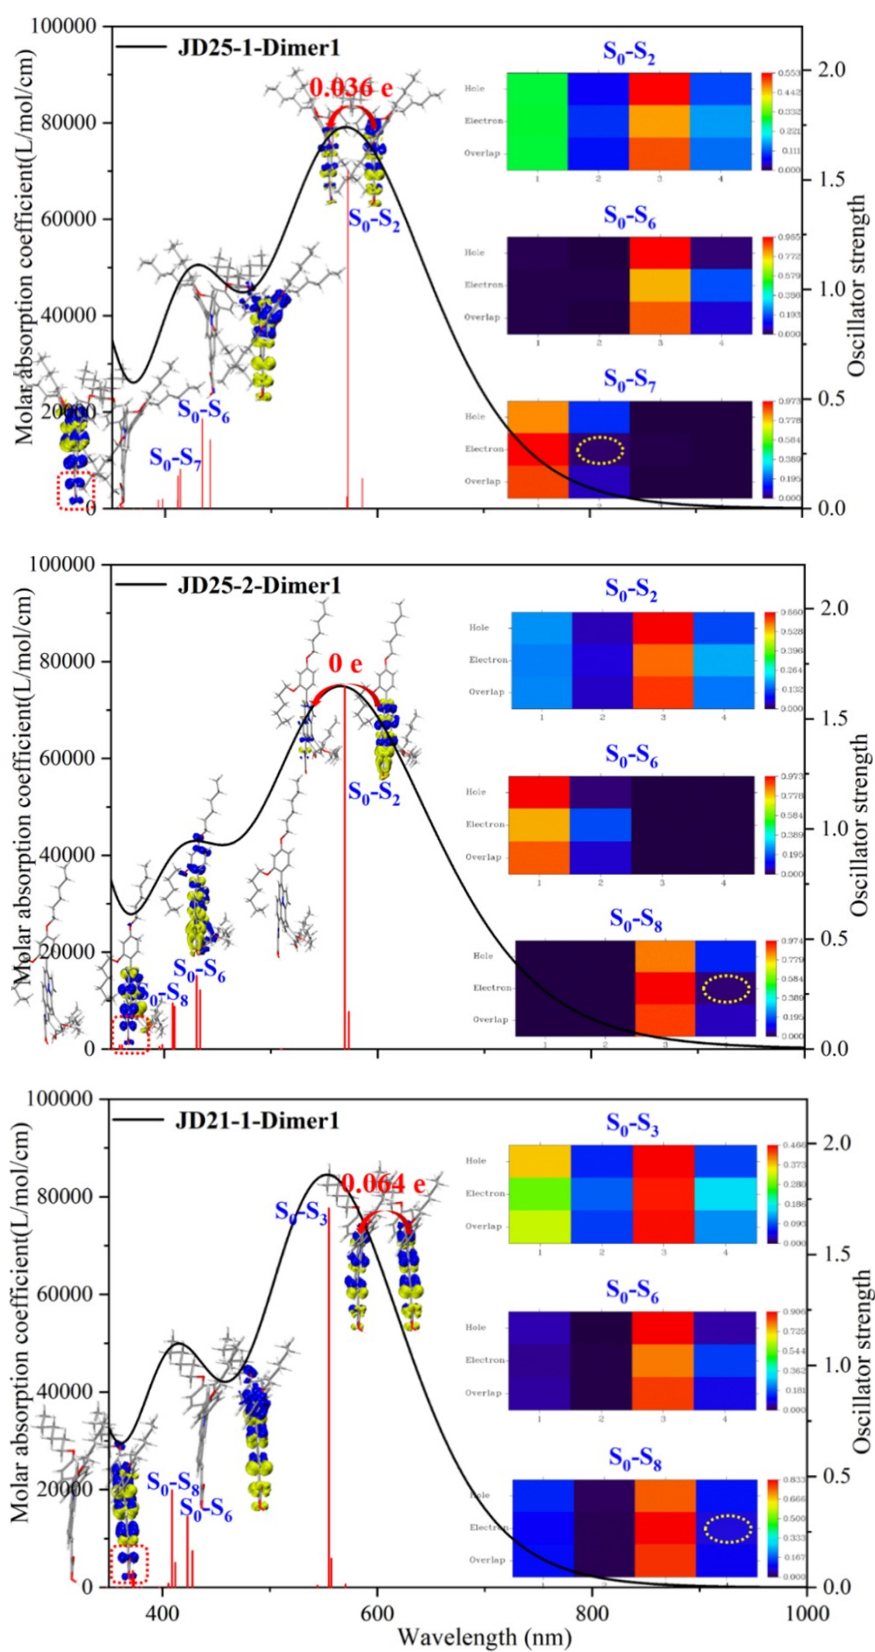

Fig. S16 Simulated absorption spectra with oscillator strength ( $f$ ), hole and electron distributions (isosurface = 0.02 a.u.) with the amount of electron transfer for the transition at the maximum

absorption peak as well as the fragment contributions plotted as heat map at TD-PCM-PBE0/6-311G\*\* level in dichloromethane solvent. (Blue regions denote the hole distributions and yellow regions denote the electron distributions. For each dimer, four fragments are defined in the following way. Each monomer in the dimer is divided into two pieces, with phenyl substituted ullazine in the left monomer as fragment 1, cyanoacrylic acid as fragment 2, phenyl substituted ullazine in the right monomer as fragment 3 and cyanoacrylic acid as fragment 4.)

Table S4 Calculated contributions of each fragment to hole and electron distributions upon photoexcitation.

| Dimer                | transition                      | h <sup>+</sup> /e <sup>-</sup> | 1           | 2            | 3     | 4            |
|----------------------|---------------------------------|--------------------------------|-------------|--------------|-------|--------------|
| <b>JD21-1-Dimer1</b> | S <sub>0</sub> →S <sub>3</sub>  | Hole                           | 37.51       | 7.13         | 46.62 | 8.75         |
|                      |                                 | Electron                       | 28.29       | <b>9.96</b>  | 45.48 | <b>16.28</b> |
|                      | S <sub>0</sub> →S <sub>6</sub>  | Hole                           | 4.83        | 0.23         | 90.59 | 4.34         |
|                      |                                 | Electron                       | 3.40        | <b>0.62</b>  | 79.62 | <b>16.36</b> |
|                      | S <sub>0</sub> →S <sub>8</sub>  | Hole                           | 12.48       | 1.12         | 75.56 | 10.84        |
|                      |                                 | Electron                       | 8.91        | <b>0.75</b>  | 83.27 | <b>7.07</b>  |
| <b>JD21-1-Dimer2</b> | S <sub>0</sub> →S <sub>4</sub>  | Hole                           | 45.87       | 6.30         | 41.80 | 6.03         |
|                      |                                 | Electron                       | 49.38       | <b>15.89</b> | 27.21 | <b>7.52</b>  |
|                      | S <sub>0</sub> →S <sub>6</sub>  | Hole                           | 63.18       | 4.81         | 30.86 | 1.64         |
|                      |                                 | Electron                       | 54.83       | <b>8.66</b>  | 28.82 | <b>7.69</b>  |
|                      | S <sub>0</sub> →S <sub>10</sub> | Hole                           | 40.64       | 2.75         | 54.21 | 2.41         |
|                      |                                 | Electron                       | 60.29       | <b>13.15</b> | 23.71 | <b>2.84</b>  |
| <b>JD25-1-Dimer1</b> | S <sub>0</sub> →S <sub>2</sub>  | Hole                           | 28.29       | 5.87         | 55.25 | 10.59        |
|                      |                                 | Electron                       | 28.69       | <b>9.21</b>  | 46.70 | <b>15.41</b> |
|                      | S <sub>0</sub> →S <sub>6</sub>  | Hole                           | 0.84        | 0.02         | 96.53 | 2.61         |
|                      |                                 | Electron                       | 0.66        | <b>0.50</b>  | 79.53 | <b>19.32</b> |
|                      | S <sub>0</sub> →S <sub>7</sub>  | Hole                           | 84.18       | 15.57        | 0.22  | 0.03         |
|                      |                                 | Electron                       | 97.27       | <b>2.25</b>  | 0.49  | <b>0.00</b>  |
| <b>JD25-2-Dimer1</b> | S <sub>0</sub> →S <sub>2</sub>  | Hole                           | 17.58       | 3.73         | 66.05 | 12.64        |
|                      |                                 | Electron                       | 16.18       | <b>5.14</b>  | 59.26 | <b>19.42</b> |
|                      | S <sub>0</sub> →S <sub>6</sub>  | Hole                           | 97.29       | 2.48         | 0.23  | 0.00         |
|                      |                                 | Electron                       | 80.90       | <b>18.88</b> | 0.17  | <b>0.05</b>  |
|                      | S <sub>0</sub> →S <sub>8</sub>  | Hole                           | 0.19        | 0.04         | 85.54 | 14.22        |
|                      |                                 | Electron                       | <b>0.27</b> | <b>0.00</b>  | 97.37 | <b>2.35</b>  |
| <b>JD25-2-Dimer2</b> | S <sub>0</sub> →S <sub>1</sub>  | Hole                           | 0.00        | -0.00        | 82.69 | 17.30        |
|                      |                                 | Electron                       | 0.01        | <b>0.00</b>  | 76.17 | <b>23.82</b> |
|                      | S <sub>0</sub> →S <sub>2</sub>  | Hole                           | 83.14       | 16.85        | 0.00  | 0.00         |
|                      |                                 | Electron                       | 76.50       | <b>23.51</b> | -0.00 | <b>-0.00</b> |
|                      | S <sub>0</sub> →S <sub>6</sub>  | Hole                           | 98.01       | 2.12         | -0.13 | -0.00        |
|                      |                                 | Electron                       | 80.77       | <b>19.25</b> | -0.01 | <b>-0.00</b> |
|                      | S <sub>0</sub> →S <sub>8</sub>  | Hole                           | 85.19       | 14.61        | 0.16  | 0.04         |

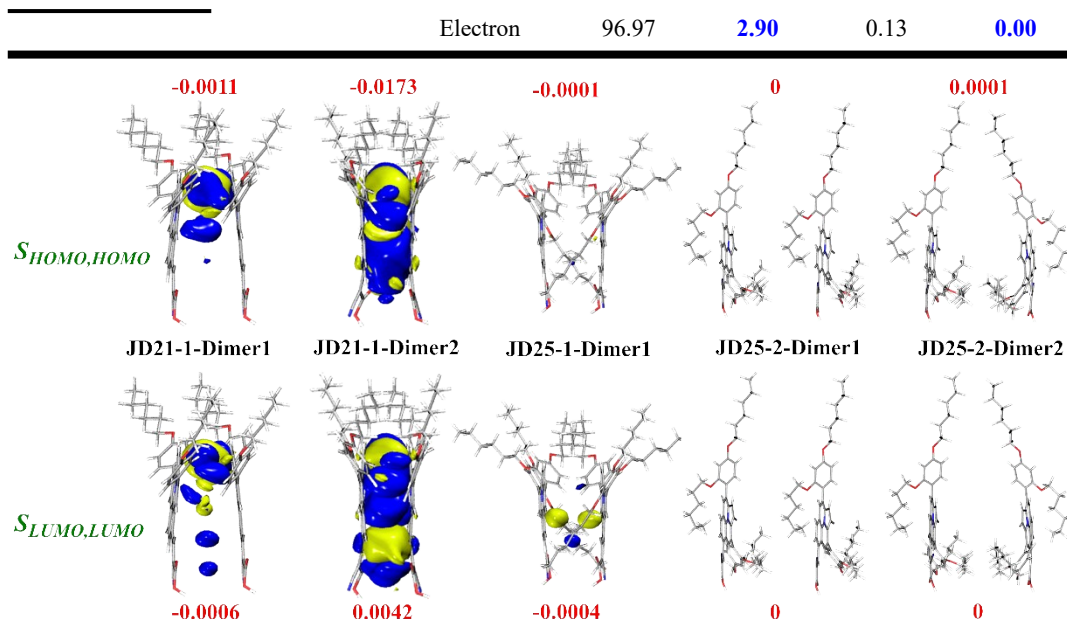

Fig. S17 HOMO-HOMO and LUMO-LUMO overlap between the two monomers for each dimer with isosurface of 0.000006 a.u. The red font is the overlap integral.

## References

1. Tian Lu, molclus program, Version 1.9.9.9, <http://www.keinsci.com/research/molclus.html>.
2. C. Bannwarth, E. Caldeweyher, S. Ehlert, A. Hansen, P. Pracht, J. Seibert, S. Spicher and S. Grimme, *WIREs Computational Molecular Science*, 2021, **11**, e1493.
3. S. Grimme, C. Bannwarth and P. Shushkov, *J. Chem. Theory Comput.*, 2017, **13**, 1989-2009.
4. C. Bannwarth, S. Ehlert and S. Grimme, *J. Chem. Theory Comput.*, 2019, **15**, 1652-1671.
5. S. Grimme, *J. Chem. Theory Comput.*, 2019, **15**, 2847-2862.
6. P. Pracht and S. Grimme, *Chem. Sci.*, 2021, **12**, 6551-6568.
7. P. Pracht, F. Bohle and S. Grimme, *Phys. Chem. Chem. Phys.*, 2020, **22**, 7169-7192.
8. L. Goerigk and S. Grimme, *J. Chem. Theory Comput.*, 2011, **7**, 291-309.
9. G. A. Petersson and M. A. Al-Laham, *J. Chem. Phys.*, 1991, **94**, 6081-6090.
10. F. Weigend, *Phys. Chem. Chem. Phys.*, 2006, **8**, 1057-1065.
11. A. V. Marenich, C. J. Cramer and D. G. Truhlar, *J. Phys. Chem. B*, 2009, **113**, 6378-6396.
12. F. Neese, *WIREs Computational Molecular Science*, 2018, **8**, e1327.
13. F. Neese, *WIREs Computational Molecular Science*, 2012, **2**, 73-78.
14. F. Neese, F. Wennmohs, U. Becker and C. Riplinger, *J. Chem. Phys.*, 2020, **152**, 224108.
15. T. Lu and Q. Chen, *Computational and Theoretical Chemistry*, 2021, **1200**, 113249.
16. S. Grimme, *Chemistry – A European Journal*, 2012, **18**, 9955-9964.
17. P. Persson, R. Bergström and S. Lunell, *J. Phys. Chem. B*, 2000, **104**, 10348-10351.
18. F. De Angelis, A. Tilocca and A. Selloni, *J. Am. Chem. Soc.*, 2004, **126**, 15024-15025.
19. P. Ordejón, E. Artacho and J. M. Soler, *Physical Review B - Condensed Matter and Materials Physics*, 1996, **53**, R10441-R10444.
20. D. Sánchez-Portal, P. Ordejón, E. Artacho and J. M. Soler, *Int. J. Quantum Chem.*, 1997, **65**, 453-461.

21. M. S. José, A. Emilio, D. G. Julian, G. Alberto, J. Javier, O. Pablo and S.-P. Daniel, *J. Phys.: Condens. Matter*, 2002, **14**, 2745.
22. J. P. Perdew, K. Burke and M. Ernzerhof, *Phys. Rev. Lett.*, 1996, **77**, 3865-3868.
23. S. Grimme, *J. Comput. Chem.*, 2006, **27**, 1787-1799.
24. R. o. Sánchez-de-Armas, J. Oviedo López, M. A. San-Miguel, J. F. Sanz, P. Ordejón and M. Pruneda, *J. Chem. Theory Comput.*, 2010, **6**, 2856-2865.
25. R. o. Sánchez-de-Armas, J. Oviedo, M. A. n. San Miguel and J. F. Sanz, *J. Phys. Chem. C*, 2011, **115**, 11293-11301.
26. S. Meng and E. Kaxiras, *Nano Lett.*, 2010, **10**, 1238-1247.
27. J. Feng, Y. Jiao, W. Ma, M. K. Nazeeruddin, M. Grätzel and S. Meng, *J. Phys. Chem. C*, 2013, DOI: 10.1021/jp310504n.
28. R. Sánchez-de-Armas, M. Á. San Miguel, J. Oviedo and J. F. Sanz, *Phys. Chem. Chem. Phys.*, 2012, **14**, 225-233.
29. J. Zhang, H.-B. Li, J.-Z. Zhang, Y. Wu, Y. Geng, Q. Fu and Z.-M. Su, *J. Mater. Chem. A*, 2013, **1**, 14000-14007.
30. J. Zhang, C.-J. Chen and H.-C. Zhu, *Appl. Surf. Sci.*, 2020, **513**, 145844.
31. H.-C. Zhu, C.-F. Li, Z.-H. Fu, S.-S. Wei, X.-F. Zhu and J. Zhang, *Appl. Surf. Sci.*, 2018, **455**, 1095-1105.
32. H.-C. Zhu, J. Zhang and Y.-L. Wang, *Appl. Surf. Sci.*, 2018, **433**, 1137-1147.
33. E. R. Johnson, S. Keinan, P. Mori-Sánchez, J. Contreras-García, A. J. Cohen and W. Yang, *J. Am. Chem. Soc.*, 2010, **132**, 6498-6506.
34. T. Lu and Q. Chen, *J. Comput. Chem.*, 2022, **43**, 539-555.
35. A. D. Becke, *J. Chem. Phys.*, 1993, **98**, 5648-5652.
36. C. Adamo and V. Barone, *J. Chem. Phys.*, 1999, **110**, 6158-6170.
37. S. Grimme, J. Antony, S. Ehrlich and H. Krieg, *J. Chem. Phys.*, 2010, **132**, 154104.
38. Y. Zhao and D. G. Truhlar, *Theor. Chem. Acc.*, 2008, **120**, 215-241.
39. T. Yanai, D. P. Tew and N. C. Handy, *Chem. Phys. Lett.*, 2004, **393**, 51-57.
